# Supplementary material for: Fractional flow reserve-guided complete revascularization versus culprit-only revascularization in acute ST-segment elevation myocardial infarction and multi-vessel disease patients: a meta-analysis and systematic review
Source: Springer Nature journal article supplement (doi:10.1186/s12872-019-1022-6), 2019-03-01

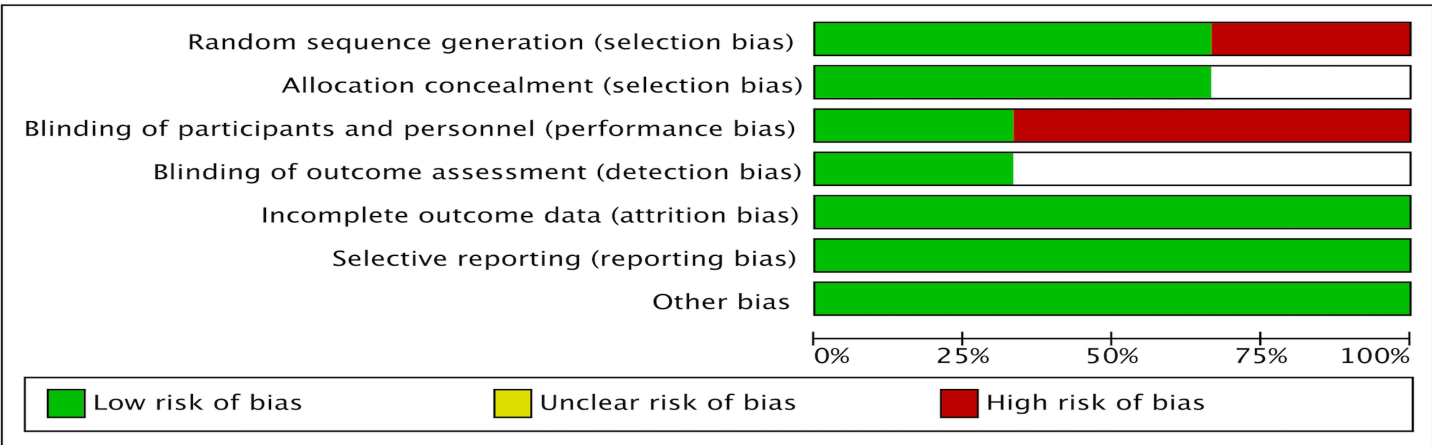

Supplement: MOESM1 [file 16520502]
