# Supplementary material for: Fractional flow reserve-guided complete revascularization versus culprit-only revascularization in acute ST-segment elevation myocardial infarction and multi-vessel disease patients: a meta-analysis and systematic review
Source: Springer Nature journal article supplement (doi:10.1186/s12872-019-1022-6), 2019-03-01
Supplement: MOESM2 [file 16520502]

|                        | Random sequence generation (selection bias) | Allocation concealment (selection bias) | Blinding of participants and personnel (performance bias) | Blinding of outcome assessment (detection bias) | Incomplete outcome data (attrition bias) | Selective reporting (reporting bias) | Other bias |
|------------------------|---------------------------------------------|-----------------------------------------|-----------------------------------------------------------|-------------------------------------------------|------------------------------------------|--------------------------------------|------------|
| Compare acute 2017     |                                             |                                         |                                                           |                                                 |                                          |                                      |            |
| DANAMI-3—PRIMULTI 2015 |                                             |                                         |                                                           |                                                 |                                          |                                      |            |
| Ghani 2012             |                                             |                                         |                                                           |                                                 |                                          |                                      |            |
